# Supplementary material for: Plasma epoxyeicosatrienoic acids and dihydroxyeicosatrieonic acids, insulin, glucose and risk of diabetes: The strong heart study
Source: PubMed Central journal article supplement — eBioMedicine. 2021 Mar 19;66:103279. doi: 10.1016/j.ebiom.2021.103279 (PMC8010619; doi:10.1016/j.ebiom.2021.103279), 2021-03-19
Supplement: mmc1.pdf [file mmc1.pdf]

Online Supplemental Materials

**Plasma Epoxyeicosatrienoic Acids and Dihydroxyeicosatrienoic Acids, Insulin, Glucose and Risk of Diabetes: The Strong Heart Study**

**Table S1. Association of EETs and DHETs with incident diabetes in women and men in the Strong Heart Family Study**

|            | Women |              |      | Men  |              |      | BMI < 30 |              |      | BMI ≥ 30 |              |      | Age < 35 years |              |      | Age ≥ 35 years |              |      |
|------------|-------|--------------|------|------|--------------|------|----------|--------------|------|----------|--------------|------|----------------|--------------|------|----------------|--------------|------|
|            | †RR   | 95% CI       | p    | †RR  | 95% CI       | p    | †RR      | 95% CI       | p    | †RR      | 95% CI       | p    | †RR            | 95% CI       | p    | †RR            | 95% CI       | p    |
| EET 14,15  | 1.05  | (0.95, 1.16) | 0.30 | 1.02 | (0.93, 1.12) | 0.69 | 0.99     | (0.84, 1.16) | 0.87 | 1.04     | (0.95, 1.15) | 0.39 | 1.02           | (0.93, 1.12) | 0.69 | 1.02           | (0.93, 1.11) | 0.72 |
| EET 11,12  | 1.04  | (0.93, 1.16) | 0.50 | 1.00 | (0.90, 1.12) | 1.00 | 0.93     | (0.77, 1.13) | 0.48 | 1.03     | (0.91, 1.15) | 0.68 | 1.00           | (0.90, 1.12) | 1.00 | 1.00           | (0.89, 1.12) | 0.98 |
| EET 8,9    | 1.10  | (1.00, 1.20) | 0.06 | 1.07 | (0.98, 1.18) | 0.14 | 1.05     | (0.91, 1.21) | 0.53 | 1.10     | (1.00, 1.21) | 0.05 | 1.07           | (0.98, 1.17) | 0.14 | 1.07           | (0.97, 1.17) | 0.18 |
| EET 5,6    | 1.06  | (0.96, 1.18) | 0.22 | 1.03 | (0.94, 1.13) | 0.54 | 1.02     | (0.87, 1.20) | 0.83 | 1.05     | (0.96, 1.16) | 0.30 | 1.03           | (0.94, 1.13) | 0.54 | 1.03           | (0.94, 1.13) | 0.55 |
| DHET 14,15 | 0.90  | (0.80, 1.01) | 0.07 | 0.94 | (0.85, 1.05) | 0.30 | 0.93     | (0.77, 1.12) | 0.42 | 0.96     | (0.86, 1.06) | 0.40 | 0.94           | (0.85, 1.05) | 0.30 | 0.93           | (0.83, 1.04) | 0.19 |
| DHET 11,12 | 0.98  | (0.86, 1.11) | 0.71 | 1.01 | (0.89, 1.14) | 0.89 | 1.00     | (0.84, 1.19) | 0.99 | 1.03     | (0.92, 1.16) | 0.59 | 1.01           | (0.90, 1.14) | 0.87 | 0.99           | (0.88, 1.12) | 0.89 |
| DHET 8,9   | 1.01  | (0.88, 1.17) | 0.87 | 1.08 | (0.95, 1.22) | 0.25 | 0.98     | (0.83, 1.16) | 0.82 | 1.11     | (0.98, 1.25) | 0.12 | 1.08           | (0.95, 1.22) | 0.24 | 1.08           | (0.95, 1.23) | 0.22 |
| DHET 5,6   | 1.03  | (0.91, 1.18) | 0.62 | 1.14 | (1.00, 1.30) | 0.04 | 1.07     | (0.88, 1.31) | 0.48 | 1.19     | (1.05, 1.35) | 0.01 | 1.14           | (1.00, 1.30) | 0.04 | 1.15           | (1.01, 1.30) | 0.04 |

Covariates included age, site, education, smoking, physical activity, BMI, waist circumference and LDL.

†RR: Relative risk of incident diabetes associated with one SD higher log EET/DHET species

Abbreviations: EET=Epoxyeicosatrienoic Acid; DHET= Dihydroxyeicosatrienoic acid; BMI=body mass index

**Table S2: Associations of EET 14,15 with fasting glucose in the Strong Heart Study and the Strong Heart Family Study, stratified by age, sex, and body mass index**

|          | SHS   |               | SHFS  |                | Meta-analysis |                |         |
|----------|-------|---------------|-------|----------------|---------------|----------------|---------|
|          | †Beta | 95% CI        | †Beta | 95% CI         | †Beta         | 95% CI         | p-value |
| Age      |       |               |       |                |               |                |         |
| < median | 0.37  | (-0.92, 1.67) | -0.11 | (-0.91, 0.69)  |               |                |         |
| > median | -0.31 | (-2.05, 1.43) | -0.33 | (-1.13, 0.48)  |               |                |         |
| Sex      |       |               |       |                |               |                |         |
| Women    | -0.14 | (-1.40, 1.12) | -0.46 | (-1.20, 0.28)  | -0.38         | (-1.02, 0.26)  | 0.244   |
| Men      | 0.75  | (-1.34, 2.84) | 0.18  | (-0.54, 0.90)  | 0.24          | (-0.44, 0.92)  | 0.484   |
| BMI      |       |               |       |                |               |                |         |
| < 30     | -0.31 | (-1.53, 0.91) | -0.92 | (-1.58, -0.26) | -0.79         | (-1.37, -0.20) | 0.008   |
| ≥ 30     | 1.03  | (-1.31, 3.38) | 0.48  | (-0.27, 1.23)  | 0.53          | (-0.19, 1.24)  | 0.147   |

Covariates included age, site, education, smoking, physical activity, BMI, waist circumference and LDL.

†Beta: mean difference in mg/dL glucose associated with one SD higher log EET 14,15

Abbreviations: EET=Epoxyeicosatrienoic Acid; DHET= Dihydroxyeicosatrienoic acid; BMI=body mass index

**Table S3: Associations of EET 14,15 with insulin in the Strong Heart Study and the Strong Heart Family Study, stratified by age, sex, and body mass index**

|          | SHS  |              | SHFS |              | Meta-analysis |              |         |
|----------|------|--------------|------|--------------|---------------|--------------|---------|
|          | †GMR | 95% CI       | †GMR | 95% CI       | †GMR          | 95% CI       | p-value |
| Age      |      |              |      |              |               |              |         |
| < median | 1.00 | (0.92, 1.09) | 1.06 | (1.00, 1.13) |               |              |         |
| > median | 0.99 | (0.89, 1.10) | 1.04 | (0.99, 1.09) |               |              |         |
| Sex      |      |              |      |              |               |              |         |
| Women    | 1.00 | (0.93, 1.09) | 1.07 | (1.01, 1.12) | 1.05          | (1.00, 1.09) | 0.030   |
| Men      | 0.98 | (0.87, 1.11) | 1.03 | (0.97, 1.09) | 1.02          | (0.97, 1.07) | 0.440   |
| BMI      |      |              |      |              |               |              |         |
| < 30     | 0.99 | (0.93, 1.06) | 1.02 | (0.96, 1.07) | 1.01          | (0.97, 1.05) | 0.726   |
| ≥ 30     | 0.97 | (0.82, 1.14) | 1.09 | (1.04, 1.14) | 1.08          | (1.03, 1.13) | 0.001   |

Covariates included age, site, education, smoking, physical activity, BMI, waist circumference and LDL.

†GMR: geometric mean ratios of plasma insulin associated with one SD higher log EET 14,15

Abbreviations: EET=Epoxyeicosatrienoic Acid; DHET= Dihydroxyeicosatrienoic acid; BMI=body mass index

**Table S4: Associations of DHET 14,15 with fasting glucose in the Strong Heart Study and the Strong Heart Family Study, stratified by age, sex, and body mass index**

|          | SHS               |               | SHFS              |                | Meta-analysis     |                |         |
|----------|-------------------|---------------|-------------------|----------------|-------------------|----------------|---------|
|          | <sup>†</sup> Beta | 95% CI        | <sup>†</sup> Beta | 95% CI         | <sup>†</sup> Beta | 95% CI         | p-value |
| Age      |                   |               |                   |                |                   |                |         |
| < median | -0.96             | (-2.48, 0.57) | -0.68             | (-1.54, 0.18)  |                   |                |         |
| > median | 0.57              | (-1.20, 2.35) | -1.16             | (-1.92, -0.39) |                   |                |         |
| Sex      |                   |               |                   |                |                   |                |         |
| Women    | -0.49             | (-1.88, 0.90) | -1.17             | (-1.87, -0.47) | -1.03             | (-1.66, -0.41) | 0.001   |
| Men      | 0.12              | (-2.18, 2.41) | -0.55             | (-1.52, 0.43)  | -0.44             | (-1.34, 0.46)  | 0.334   |
| BMI      |                   |               |                   |                |                   |                |         |
| < 30     | -0.53             | (-2.06, 0.99) | -0.69             | (-1.50, 0.13)  | -0.65             | (-1.37, 0.07)  | 0.075   |
| ≥ 30     | 0.16              | (-1.95, 2.28) | -1.15             | (-1.95, -0.35) | -0.98             | (-1.73, -0.23) | 0.010   |

Covariates included age, site, education, smoking, physical activity, BMI, waist circumference and LDL.

<sup>†</sup>Beta: mean difference in mg/dL glucose associated with one SD higher log DHET 14,15

Abbreviations: EET=Epoxyeicosatrienoic Acid; DHET= Dihydroxyeicosatrienoic acid; BMI=body mass index

**Table S5: Associations of DHET 14,15 with insulin in the Strong Heart Study and the Strong Heart Family Study, stratified by age, sex, and body mass index**

|          | SHS              |              | SHFS             |              | Meta-analysis    |              |         |
|----------|------------------|--------------|------------------|--------------|------------------|--------------|---------|
|          | <sup>†</sup> GMR | 95% CI       | <sup>†</sup> GMR | 95% CI       | <sup>†</sup> GMR | 95% CI       | p-value |
| Age      |                  |              |                  |              |                  |              |         |
| < median | 0.92             | (0.82, 1.02) | 0.93             | (0.86, 1.01) |                  |              |         |
| > median | 0.89             | (0.80, 0.99) | 0.94             | (0.89, 0.99) |                  |              |         |
| Sex      |                  |              |                  |              |                  |              |         |
| Women    | 0.94             | (0.86, 1.03) | 0.92             | (0.87, 0.97) | 0.92             | (0.88, 0.97) | 0.001   |
| Men      | 0.84             | (0.74, 0.94) | 0.96             | (0.91, 1.01) | 0.94             | (0.90, 0.99) | 0.010   |
| BMI      |                  |              |                  |              |                  |              |         |
| < 30     | 0.92             | (0.82, 1.03) | 0.90             | (0.85, 0.96) | 0.91             | (0.86, 0.96) | <0.001  |
| ≥ 30     | 0.91             | (0.83, 1.00) | 0.97             | (0.92, 1.03) | 0.96             | (0.91, 1.00) | 0.063   |

Covariates included age, site, education, smoking, physical activity, BMI, waist circumference and LDL.

<sup>†</sup>GMR: geometric mean ratios of plasma insulin associated with one SD higher log DHET 14,15

Abbreviations: EET=Epoxyeicosatrienoic Acid; DHET= Dihydroxyeicosatrienoic acid; BMI=body mass index
